# Supplementary material for: Estimation of the 3-D geoelectric field at the Earth's surface using spherical elementary current systems
Source: Copernicus journal article supplement (doi:10.5194/angeo-43-271-2025), 2025-05-27
Supplement: Supplementary file 1 [file angeo-43-271-2025-supplement.zip]

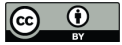

*Supplement of*

## **Estimation of the 3-D geoelectric field at the Earth's surface using spherical elementary current systems**

**Liisa Juusola et al.**

*Correspondence to:* Liisa Juusola (liisa.juusola@fmi.fi)

- [angeo-43-271-2025-supplement-title-page.pdf](#)
- [Edf2Ecf\\_coefficients.txt](#)

The copyright of individual parts of the supplement might differ from the article licence.
